# Supplementary material
Source: publisher figshare collection journal article supplement (https://gsapubs.figshare.com/ndownloader/files/34835991)
Supplement: Supplementary file 1 [file 34835991]

## Sheet: Sheet1
TABLE S1. SUMMARY OF REGIONAL IGNIMBRITES, CALDERA SOURCES, AND 40AR/39AR AGES,
		SOUTHERN ROCKY MOUNTAIN VOLCANIC FIELD
	[Updated from Lipman and McIntosh (2008), Lipman et al. (2015), Lipman and Zimmerer (2019)]
Ignimbrite								Caldera
Tuff	% SiO2	Rock, phenocrysts*	Vol., km3		Age, Ma	No.#		Name	Area, km
West San Juan Mountains
Sunshine Peak	Zoned, 76-68	Xp rhy-xl dac; qtz, sodic san	200-500		23.09±0.04	(3)		Lake City	15 x 18
Latir Mountains, New Mexico
Amalia	76-77	Xp peralk rhy: qtz, sodic san	500		25.39±0.04	(6)		Questa	14 x >15
Central San Juan Mountains
Snowshoe Mountain	62-66	Xl-rich dacite	>500		27.05±0.02	(4)		Creede	20 x 25
Central San Juan Mountains: San Luis caldera complex
Nelson Mountain	Zoned: 74-63	Xp rhy; xl dacite	>500		27.07±0.03	(8)		San Luis-Cochetopa	9x9, 20x25
Cebolla Creek	61-64	Xl dacite, hbl, no sanidine	250		~27.08±0.06	(S)		San Luis complex	14 x 16
Rat Creek	Zoned 7:4-65	Xp rhy - xl dacite	150		27.09±0.02	(8)		San Luis complex	9 x 12
Central San Juan Mountains
Wason Park	Zoned: 72-63	Xl rhyolite - dacite	>500		27.55±0.02	(6)		South River	20 x 20
Blue Creek	64-68	Xl dacite, no sanidine	250		27.73±0.16	(1,b)		[concealed]	?
Carpenter Ridge	Zoned: 74-66	Xp rhy - xl dacite	>1000		27.72±0.02	(5)		Bachelor	25 x 30
West San Juan Mountains
Crystal Lake	72-74	Xp rhyolite	50-100		27.86±0.04	(3)		Silverton	20x20
Central San Juan Mountains
Fish Canyon	66-68	Xl dacite; hbl, qtz	5000		28.201±0.01	--		La Garita	35 x 75
West San Juan Mountains
Sapinero Mesa	72-75	Xp rhyolite	>1000		28.41±0.03	(7)		Uncompahgre-San Juan	20 x 45
Dillon Mesa	72-75	Xp rhyolite	50-100		28.60±0.03	(6)		Uncompahgre?	20 x 20
Blue Mesa	72-74	Xp rhyolite	200-500		28.64±0.04	(3)		Lost Lakes (buried)	10 x 10
Ute Ridge	66-68	Xl dacite, sanidine	250-500		28.98±0.04	(3)		Ute Creek	8 x 8?
Southeast San Juan Mountains (Treasure Mountain Group)
Chiquito Peak	64-67	Xl dacite, sanidine	500-1000		28.77±0.03	(4)		Platoro	18 x 22
Central San Juan Mountains
Masonic Park	62-66	Xl dacite, no sanidine	100-200?		28.92±0.07	(2,b)		[concealed]	?
Southeast San Juan Mountains (Treasure Mountain Group)
South Fork	68-70	Xl dacite, sanidine	50-100		29.08±0.06	(2)		Platoro/ Summitville?	8 x 12?
Ra Jadero	64-66	Xl dacite, sanidine	150		29.14±0.04	(3)		Summitville?	8 x 12
Ojito Creek	67-70	Xl dacite, sanidine	100		~29.5±0.3	(S)		Summitville?	8 x 12
Middle Tuff		Sanidine, from bedded tuff			29.93±0.03	(1)
La Jara Canyon	66-68	Xl dacite, no sanidine	500-1000		~30.0±0.3	(S)		Platoro	20 x 24
Black Mountain	67-69	Xl dacite, no sanidine	200-500		30.19±0.16	(1,h)		Platoro	--
Northeast San Juan Mountains
Luders Creek		Zoned: rhyolite-dacite	50?		32.37±0.03	(4)		North Pass?	?
Saguache Creek	73-75	Alkali rhyolite; no biotite	250-500		32.48±0.03	(5)		North Pass	15 x 17
Bonanza	Zoned: 76-60	Zoned: rhy-dac-rhy-dac	1000		33.35±0.02	(21)		Bonanza	15 x 20
Thorn Ranch	77	Xp rhyolite - xl dacite	250-500?		34.15±0.03	(15)		Marshall Creek	10 x 10?
North-South Sawatch Range Trend
Badger Creek	69-70	Xl dacite	250?		34.26±0.05	(8)		Mount Aetna	10 x 15
Grizzly Peak	Zoned: 77-57	Zoned rhy-dacite-andesite	500?		34.75±0.07	(2)		Grizzly Peak	15 x 17
Wall Mountain	70-73	Xl rhyolite	1000±		37.19±0.03	(9)		Mount Princeton	15 x 30?
* Rhy, rhyolite; dac, dacite; san, sanidine; qtz, quartz; hbl, hornblende; Xl, crystal-rich; Xp, crystal-poor; peralk, peralkaline
Determinations are on sanidine, except as noted: b, biotite; h hornblende; S, stratigraphic constraint. Number of analyses in brackets
#Ages are weighted means from most-reliable published 40Ar/39Ar data, except as noted (S). Ages in all supplemental tables have been recalculated as needed, applying the ratio of reported or assumed monitor ages for Fish Canyon Tuff to the currently widely accepted value of 28.201 Ma (Kuiper et al., 2008). Alternative calibrations yield values that differ beyond our reporting level of two signifi…
Supplemental references:
Kuiper, K.F., Deino, A., Hilgen, F.J., Krijgsman, W., Renne, P.R., Wijbrans, J.R., 2008, Synchronizing rock clocks of earth history:
Science, v. 320, p. 500–504.
Lipman, P.W., and Zimmerer, M.J., 2019, Magmato-tectonic links: Ignimbrite calderas, regional dike swarms,
and the transition from arc to rift in the Southern Rocky Mountains: Geosphere, v. 15, p.1893-1926

## Sheet: G49964
Lipman, P.W., Zimmerer, M.J., and Gilmer, A.K., 2022, Early incubation and prolonged maturation of large ignimbrite magma bodies: Evidence from the Southern Rocky Mountain volcanic field, Colorado, USA: Geology, v. 50, https://doi.org/10.1130/G49964.1
